# Supplementary material
Source: PubMed Central journal article supplement (PMC5843704)
Supplement: BPH-175-1066-s001.pdf [file BPH-175-1066-s001.pdf]

**Adiponectin inhibits inflammatory cytokines production by Beclin-1 phosphorylation and Bcl-2 mRNA destabilization: Role for autophagy induction**

**Running title: Adiponectin modulates the association of Beclin-1 and Bcl-2**

**Nirmala Tilija Pun<sup>1</sup> and Pil-Hoon Park<sup>1\*</sup>**

<sup>1</sup>College of Pharmacy, Yeungnam University, Gyeongsan, Republic of Korea

**\*Corresponding author:**

Pil-Hoon Park, PhD

College of Pharmacy, Yeungnam University, Gyeongsan, Republic of Korea

Phone: 82-53-810-2826

Fax: 82-53-810-4654

Email: [parkp@yu.ac.kr](mailto:parkp@yu.ac.kr)

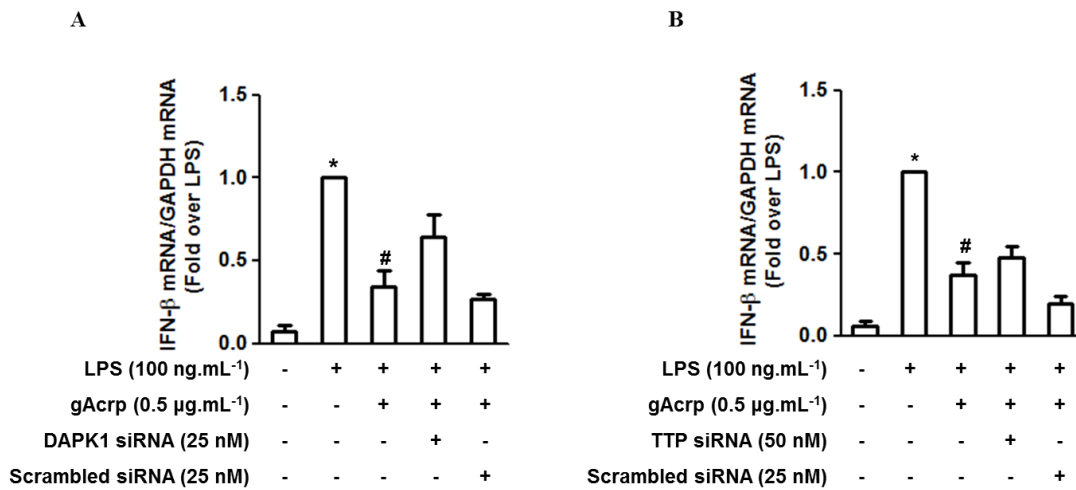

**Supplementary Figure 1. Role of DAPK1 and tristetraprolin (TTP) signaling in the suppression of LPS-induced IFN-β mRNA expression by globular adiponectin (gAcrp) in RAW 264.7 macrophages**

(A and B) After transfection with siRNA targeting DAPK1 (A) or TTP (B), RAW 264.7 cells were treated with gAcrp for 24 h, followed by LPS treatment for an additional 6 h. IFN-β mRNA level was determined by qRT-PCR. Values are expressed as mean ± SEM (n = 3 or 5). \*P < 0.05 compared with the control cells and #P < 0.05 compared with the cells treated with LPS.
